# Supplementary material for: CzcR Is Essential for Swimming Motility in Pseudomonas aeruginosa during Zinc Stress
Source: PubMed Central journal article supplement (PMC9769499; doi:10.1128/spectrum.02846-22), 2022-11-23
Supplement: spectrum.02846-22-s0001.pdf [file spectrum.02846-22-s0001.pdf]

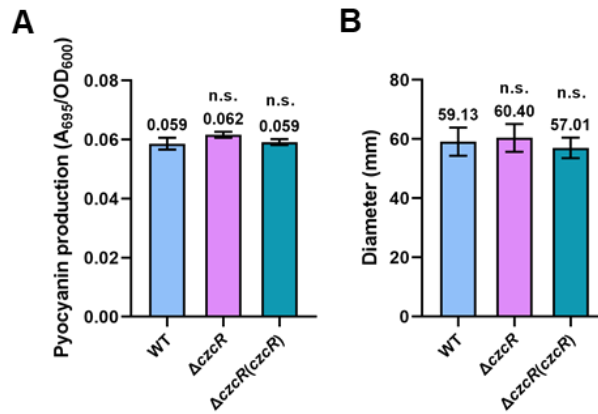

**Figure S1. Quantification of PYO production (A) and swimming motility (B) with the supplementation of Na<sub>2</sub>SO<sub>4</sub> in PAO1 WT, ΔczcR and ΔczcR(czcR) strains. n.s.: not significant versus WT based on one-way ANOVA.**

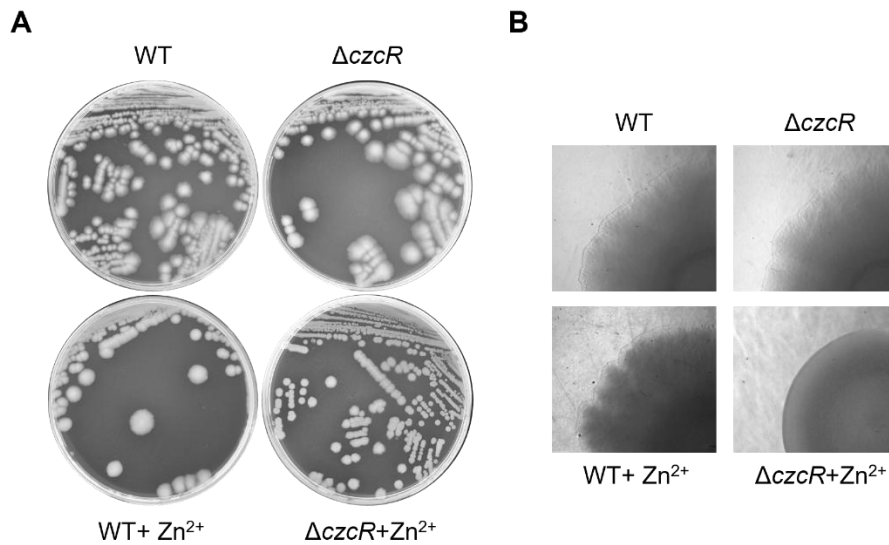

**Figure S2. Colony phenotypes of PAO1 WT and ΔczcR strains grown on the plates with the supplementation of Zn<sup>2+</sup> or not. (A)** PAO1 WT and ΔczcR strains were streaked on the LB agar plates with the supplementation of Zn<sup>2+</sup> or not. **(B)** Colonies of PAO1 WT and ΔczcR strains were observed under a stereo microscope (Laité LSF763). The ΔczcR strain grown in the presence of Zn<sup>2+</sup> stress showed a smooth colony phenotype compared to others.

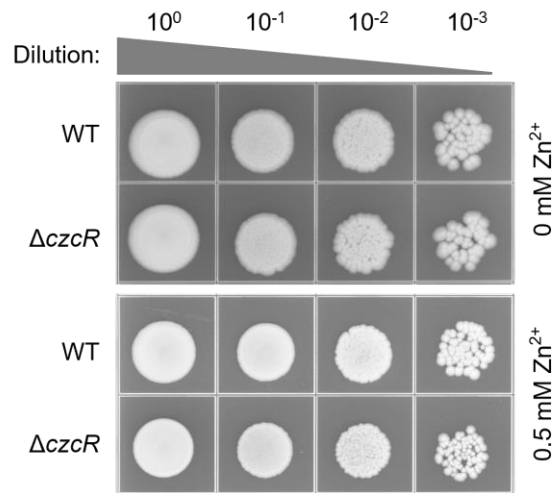

**Figure S3. Growth of the PAO1 WT and  $\Delta czcR$  strains on the plates with or without  $Zn^{2+}$  supplementation.** Overnight culture of PAO1 WT and  $\Delta czcR$  strains were serially diluted and spotted on the LB plates containing  $Zn^{2+}$  or not, which showed comparable growth between WT and  $\Delta czcR$  strains in the absence or presence of  $Zn^{2+}$  stress.

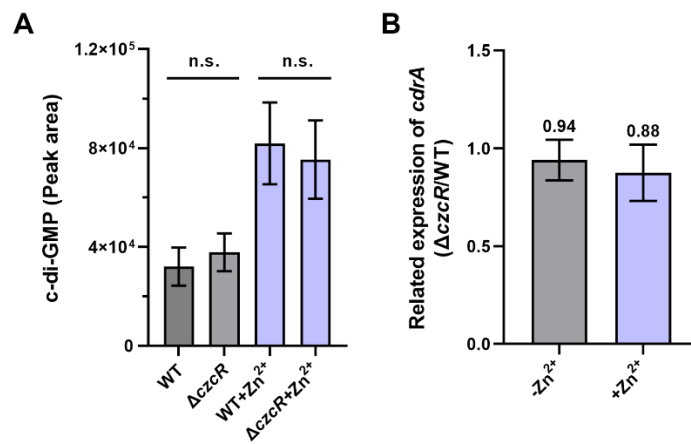

**Figure S4. CzcR does not affect the c-di-GMP signaling pathway.** (A) Measurement of intracellular c-di-GMP by LC-MS in PAO1 WT and  $\Delta czcR$  strains grown in the absence or presence of  $Zn^{2+}$  stress. (B) Measurement of the *cdrA* expression by RT-qPCR in PAO1 WT and  $\Delta czcR$  strains grown in the absence or presence of  $Zn^{2+}$  stress. n.s. not significant, based on Student's *t* test.

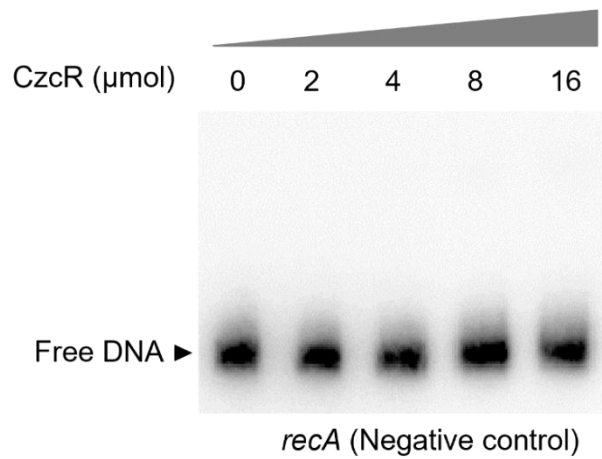

**Figure S5. CzcR does not bind to the DNA fragment amplified from the *recA* gene.** EMSA examination showing the incapable binding of CzcR to a 126-bp DNA fragment which served as a negative control.

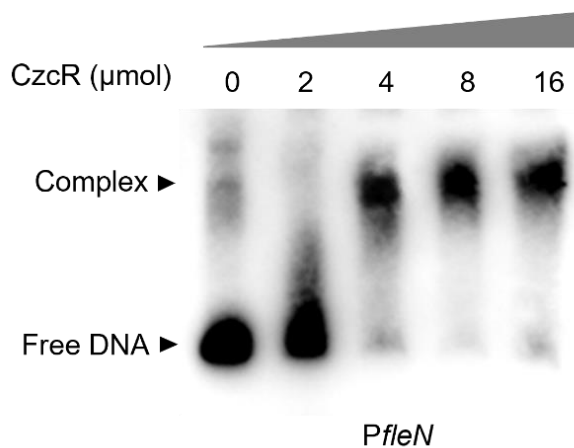

**Figure S6. CzcR binds to the promoter of the operon containing the *fleN* and *fliA* genes.** EMSA examination showing the binding of CzcR to the promoter of *fleN/fliA* (*PfleN*).

**Table S1.** Bacterial strains and plasmids used in this study.

| Strains and plasmids              | Description                                                                                                                                                    | Reference or source |
|-----------------------------------|----------------------------------------------------------------------------------------------------------------------------------------------------------------|---------------------|
| <b>Strains</b>                    |                                                                                                                                                                |                     |
| <i>P. aeruginosa</i> PAO1         | Wild-type PAO1                                                                                                                                                 | Lab collection      |
| $\Delta czcR$                     | PAO1 with the deletion of <i>czcR</i>                                                                                                                          | This study          |
| $\Delta czcR(czcR)$               | $\Delta czcR$ with the complemented <i>czcR</i>                                                                                                                | This study          |
| $\Delta czcR(czcR^{D8A})$         | $\Delta czcR$ with the complemented <i>czcR</i> <sup>D8A</sup>                                                                                                 | This study          |
| $\Delta czcR(czcR^{D51A})$        | $\Delta czcR$ with the complemented <i>czcR</i> <sup>D51A</sup>                                                                                                | This study          |
| <i>E. coli</i> DH5 $\alpha$       | F- $\phi$ 80d lacZ $\Delta$ M15 $\Delta$ (lacZYA-argF) U169 end A1 recA1 hsdR17 (rk <sup>-</sup> , mk <sup>+</sup> ) supE44 $\lambda$ - thi-1 gyrA96relA1 phoA | TransGen Biotech    |
| <i>E. coli</i> BL21 (DE3)         | F <sup>-</sup> <i>ompT hsdS</i> (r <sub>B</sub> m <sub>B</sub> ) <i>gal dcm</i> (DE3)                                                                          | TransGen Biotech    |
| <b>Plasmids</b>                   |                                                                                                                                                                |                     |
| p18Gm- $\Delta czcR$              | For <i>czcR</i> deletion                                                                                                                                       | This study          |
| pRK2013                           | Helper plasmid for the tri-parental matting, Kan <sup>r</sup>                                                                                                  | Lab collection      |
| CTX-P <sub>flgB</sub>             | mini-CTX-lux containing the promoter of <i>flgB</i>                                                                                                            | This study          |
| CTX-P <sub>flgF</sub>             | mini-CTX-lux containing the promoter of <i>flgF</i>                                                                                                            | This study          |
| CTX-P <sub>fliC</sub>             | mini-CTX-lux containing the promoter of <i>fliC</i>                                                                                                            | This study          |
| CTX-P <sub>fliD</sub>             | mini-CTX-lux containing the promoter of <i>fliD</i>                                                                                                            | This study          |
| CTX-P <sub>fliE</sub>             | mini-CTX-lux containing the promoter of <i>fliE</i>                                                                                                            | This study          |
| CTX-P <sub>PA1442</sub>           | mini-CTX-lux containing the promoter of <i>PA1442</i>                                                                                                          | This study          |
| CTX-P <sub>flhA</sub>             | mini-CTX-lux containing the promoter of <i>flhA</i>                                                                                                            | This study          |
| CTX-P <sub>motA</sub>             | mini-CTX-lux containing the promoter of <i>motA</i>                                                                                                            | This study          |
| pTNS2                             | Helper plasmid for the Tn7 transposition, Amp <sup>r</sup>                                                                                                     | Lab collection      |
| pTn7- <i>czcR</i>                 | pUC18T-mini-Tn7T-Gm containing the promoter region and ORF of <i>czcR</i>                                                                                      | This study          |
| pTn7- <i>czcR</i> <sup>D8A</sup>  | Point mutated of D8A in pTn7- <i>czcR</i> vector                                                                                                               | This study          |
| pTn7- <i>czcR</i> <sup>D51A</sup> | Point mutated of D51A in pTn7- <i>czcR</i> vector                                                                                                              | This study          |
| pET28a- <i>czcR</i>               | pET-28a (+) containing the ORF of <i>czcR</i>                                                                                                                  | This study          |

**Table S2.** Primers used in this study.

| Name                        | Sequence (5'-3')                             | Description                                               |
|-----------------------------|----------------------------------------------|-----------------------------------------------------------|
| pK- <i>czcR</i> -uF         | GAGCTCGGTACCCGGGGATCCTGTCCTCGACGCTCCAGGA     | Amplify the homologous sequences for <i>czcR</i> deletion |
| pK- <i>czcR</i> -uR         | CGTCATGTTGCCCCCTATATAAAGTATGGATT             |                                                           |
| pK- <i>czcR</i> -dF         | ATATAGGGGGCGAACATGACGCCACCAGGCCGA            |                                                           |
| pK- <i>czcR</i> -dR         | ACGACGGCCAGTGCCAAGCTTGGAGAAGTGGCAGAGCTGGC    |                                                           |
| Veri- <i>czcR</i> -F        | CCAGTTGGGTCCAGGCGATCTC                       | Verify the deletion of <i>czcR</i> in PAO1                |
| Veri- <i>czcR</i> -R        | CAGTTCCTCGGCATTGGACT                         |                                                           |
| CTX- <i>PflgB</i> -F        | CTATAGGGCGAATTGGGTACCGAATACGATGCGATGTTTCGAGG | Amplify the promoter of <i>PflgB</i>                      |
| CTX- <i>PflgB</i> -R        | CTAAAGAAGAATTGGGGATCCGTTGTTGGCCAGCACTTCGG    |                                                           |
| CTX- <i>PflgF</i> -F        | CTATAGGGCGAATTGGGTACCCCAATGCCAAGACCATCCAG    | Amplify the promoter of <i>PflgF</i>                      |
| CTX- <i>PflgF</i> -R        | CTAAAGAAGAATTGGGGATCCGTTGTTGGCATGAGCACGC     |                                                           |
| CTX- <i>PfliC</i> -F        | CTATAGGGCGAATTGGGTACCGAATCCGGGTTTTTCTCGAAC   | Amplify the promoter of <i>PfliC</i>                      |
| CTX- <i>PfliC</i> -R        | CTAAAGAAGAATTGGGGATCCTGGTCAGACGCTGCAACGA     |                                                           |
| CTX- <i>PfliD</i> -F        | CTATAGGGCGAATTGGGTACCGCAACTTGAAGTTCAGCATCGA  | Amplify the promoter of <i>PfliD</i>                      |
| CTX- <i>PfliD</i> -R        | CTAAAGAAGAATTGGGGATCCCATCTTGTTCACCAGATCGGTG  |                                                           |
| CTX- <i>PfliE</i> -F        | CTATAGGGCGAATTGGGTACCCTGCGCTACAAGCTCGCC      | Amplify the promoter of <i>PfliE</i>                      |
| CTX- <i>PfliE</i> -R        | CTAAAGAAGAATTGGGGATCCGGCTTCCATTTGCATGGAAC    |                                                           |
| CTX- <i>PflhA</i> -F        | CTATAGGGCGAATTGGGTACCGATTACGCTAGCTCATCGGGTT  | Amplify the promoter of <i>PflhA</i>                      |
| CTX- <i>PflhA</i> -R        | CTAAAGAAGAATTGGGGATCCCAGGTTGCTGCGCACATTG     |                                                           |
| CTX- <i>PmotA</i> -F        | CTATAGGGCGAATTGGGTACCGGATGGACAACGCCAGCG      | Amplify the promoter of <i>PmotA</i>                      |
| CTX- <i>PmotA</i> -R        | CTAAAGAAGAATTGGGGATCCGGAGAGCAGGAAGCCCCC      |                                                           |
| CTX- <i>PPA1442</i> -F      | CTATAGGGCGAATTGGGTACCGATGAGGAAACCCTCGCCG     | Amplify the promoter of <i>PPA1442</i>                    |
| CTX- <i>PPA1442</i> -R      | CTAAAGAAGAATTGGGGATCCCAGCTTCAGCTTGCTCTTGCC   |                                                           |
| Tn7- <i>czcR</i> -F         | CATGAGCTCACTAGTGGATCCCGGCATGTTCCGCTCCTCGTC   | Amplify <i>czcR</i> to construct pTn7- <i>czcR</i>        |
| Tn7- <i>czcR</i> -R         | CGAGGTACCGGGCCCAAGCTTTCACGGCGCGCTTCCAGGACG   |                                                           |
| Tn7-D8A-F                   | TATCGAAGCGGAAGTCAAGACTGCCGACTACCTG           | For the D8A mutation of <i>czcR</i>                       |
| Tn7-D8A-R                   | TGACTTCCGCTTCGATAATAAGGATGCGCATG             |                                                           |
| Tn7-D51A-F                  | TGATCCTCGCGGTCAACCTGCCCGGCATCGAC             | For the D51A mutation of <i>czcR</i>                      |
| Tn7-D51A-R                  | GTTGACCGCGAGGATCACCAGTTCGTAAGGGT             |                                                           |
| PTn7R                       | CACAGCATAACTGGACTGATTTC                      | Verify the Tn7-based chromosomal integration              |
| PglmS-down                  | GCACATCGGCGACGTGCTCTC                        |                                                           |
| 28a- <i>czcR</i> -F         | CAGCAAATGGGTTCGCGGATCCATGCGCATCCTTATTATCGAAG | Amplify <i>czcR</i> to construct pET28a- <i>czcR</i>      |
| 28a- <i>czcR</i> -R         | TGGTGGTGCTCGAGTGGCGCCGCTCATCGGCGCGCTTCCAGG   |                                                           |
| Veri-28a-F                  | GAATTGTGAGCGGATAACAATTCC                     | Verify the construction of pET28a- <i>czcR</i>            |
| Veri-28a-R                  | CAAGACCCGTTTAGAGGCC                          |                                                           |
| <i>P<sub>recA</sub></i> -F  | TCCATTGAAGTCCTCGCGAAGT                       | Amplification of DNA sequences for EMSA                   |
| <i>P<sub>recA</sub></i> -R  | GCAACCGTTCGGAACATTCTTCC                      |                                                           |
| <i>P<sub>pflgB</sub></i> -F | GTTCCAGGGGCTTGCCAC                           |                                                           |
| <i>P<sub>pflgB</sub></i> -R | TCGAAACTGATGCTCATGGCTG                       |                                                           |

|                              |                                |
|------------------------------|--------------------------------|
| <i>P<sub>flgF</sub></i> -F   | TTGCCCCCGAAGCCTCCGAAAG         |
| <i>P<sub>flgF</sub></i> -R   | GACGTACAGCATCTTGTCCAT          |
| <i>P<sub>fliC</sub></i> -F   | TTCAGGACCGATATTGGCGAGT         |
| <i>P<sub>fliC</sub></i> -R   | GGTGATTTCTCCAAAGGACCTAT        |
| <i>P<sub>fliD</sub></i> -F   | TACACAGTGTCTGTTTCGAAACCCG      |
| <i>P<sub>fliD</sub></i> -R   | TACTCCTATCGAGATACCGGCCA        |
| <i>P<sub>fliE</sub></i> -F   | CTGTTTCGAGCGTGCGC              |
| <i>P<sub>fliE</sub></i> -R   | CTGACTCATGACTCTTCTCCAACAG      |
| <i>P<sub>PA1442</sub></i> -F | TTTCTTAGCCATGCCAAAAATCCGT      |
| <i>P<sub>PA1442</sub></i> -R | GGCAATTTTCGAAAAGACGGG          |
| <i>P<sub>fleN</sub></i> -F   | CATCTGCTTCATACCTTGTGTTGTTCG    |
| <i>P<sub>fleN</sub></i> -R   | TGAGGACGTGGGAAGAACCG           |
| <i>P<sub>flhA</sub></i> -F   | TTGGCGAAAACCCTTTTCAATCAATGAATT |
| <i>P<sub>flhA</sub></i> -R   | GCGCACATTGCTGATCAGTTG          |
| <i>P<sub>motA</sub></i> -F   | GCCGATGATTTTTGACATGAGGACC      |
| <i>P<sub>motA</sub></i> -R   | TCATGGGTGTCGGGCTCG             |

---
